# Supplementary material for: Association between miR-31-3p expression and cetuximab efficacy in patients with KRAS wild-type metastatic colorectal cancer: a post-hoc analysis of the New EPOC trial
Source: PubMed Central journal article supplement (PMC5706840; doi:10.18632/oncotarget.21291), 2017-09-27
Supplement: oncotarget-08-93856-s001.pdf [file oncotarget-08-93856-s001.pdf]

## Association between miR-31-3p expression and cetuximab efficacy in patients with KRAS wild-type metastatic colorectal cancer: a post-hoc analysis of the New EPOC trial

### SUPPLEMENTARY MATERIALS

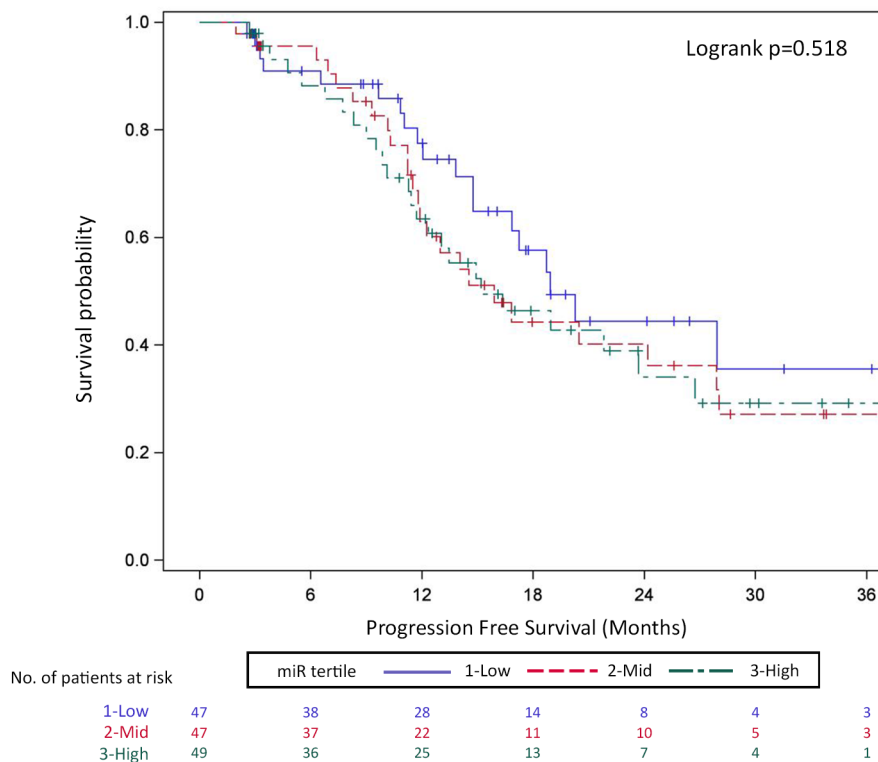

Supplementary Figure 1: Kaplan-Meier curves of progression-free survival according to miR-31-3p expression level groups (mITT population).
